# Supplementary material
Source: MDPI journal article supplement (https://www.mdpi.com/2571-550X/6/4/60)
Supplement: s1 [file s1]

**Tables S1–S29.** Dimensions (in millimetres) of skull, mandible, dentition and postcranial bones of *S. hundsheimensis* from Cova del Rinoceront compared with other remains of *Stephanorhinus* (data taken from references in brackets).

**Table S1.** Skull dimensions of *S. hundsheimensis* from Cova del Rinoceront compared with other remains of *Stephanorhinus*.

Abbreviations: H, height; L, length; Max, maximum; Min, minimum; W, width.

|                          | L nasal notch | Postorbital W | L nasal notch-orbit | L nasal tip-orbit | Occipital dorsal W | Min. fronto-parietal W | Occipital Height | H above P2 | H above P4–M1 |
|--------------------------|---------------|---------------|---------------------|-------------------|--------------------|------------------------|------------------|------------|---------------|
| # 8096                   | –             | 71.0          | –                   | –                 | 130.1              | 46.2                   | 160              | –          | –             |
| # 8661                   | 244.0         | –             | 135.0               | 383.3             | –                  | –                      | –                | 180.0      | (178.0)       |
| <i>S. etruscus</i>       |               |               |                     |                   |                    |                        |                  |            |               |
| Min/Max/                 | 138/209.5/1   | 79/126/10     | 90/123/10           | 236/327/2         | 101/174/1          | 34/60.5/               | 117/153/13       | 124/178/1  | 127/202/1     |
| Mean [29]                | 91.7          | 1.1           | 5.47                | 98.4              | 40.7               | 47.5                   | 0.6              | 59.5       | 65.0          |
| Senèze [31]              |               | 104.8         |                     |                   | 143.6              | 52.9                   | 128.2            |            |               |
| <i>S. hundsheimensis</i> |               |               |                     |                   |                    |                        |                  |            |               |
| Min/Max/                 | 217.5/289/2   | 107/145/1     | 81/122/99           | 313/400/3         | 132/175/1          | 35/88/58               | 139/191.5/1      | 156/234/2  | 150/243/2     |
| Mean [29]                | 52.6          | 23.8          | 5                   | 51.3              | 54.6               | .9                     | 62.3             | 01.4       | 07.8          |
| Isernia 33035 [31]       |               | 173.7         |                     |                   | 187.2              | 60.3                   |                  |            |               |
| Cava Redicicoli [5]      |               |               |                     |                   | 137                | 67                     | 150              |            |               |
| Hundsheim [34]           |               |               |                     |                   | 153                | 61                     |                  |            | 202           |
| Untermassfeld [38]       | 242.0         | (111)         | 99.0                | 316.0             | –                  | 35.0                   | –                |            | 222           |
| <i>S. hemitoechus</i>    |               |               |                     |                   |                    |                        |                  |            |               |
| Min/Max/                 | 231/280/24    | 107/138/1     | 95.5/143/1          | 283/385/3         | 101/160/1          | 18/70/46               | 141/186/15       | 160/228/1  | 172/225/1     |
| Mean [29]                | 8.6           | 21.1          | 15.3                | 44.2              | 30.9               | .3                     | 8.6              | 89.8       | 89.7          |
| Campagna Romana [43]     |               |               |                     |                   | 139.0              | 40.0                   | 165.0            |            |               |
| Neumark                  | 290.3         | 173.0         | 129.4               | 412.9             | 160.0              | 147.3                  | 171.5            | 223.2      | 246.0         |
| Nord [12]                | 292.5         |               | 131.0               | 415.6             |                    |                        |                  | 232.9      | 246.0         |

**Table S2.** Mandibular dimensions of *S. hundsheimensis* from Cova del Rinoceront compared with other remains of *Stephanorhinus*. Abbreviations: APD, anteroposterior diameter; asc.r., ascending ramus (APD measured at occlusal level); cor.ap., coronoid apophysis; H, height; h.r., horizontal ramus; L, length, Max, maximum; Min, minimum; Symph., symphysis.

|                          | H h.r.<br>m1-2 | H h.r.<br>m2-3 | H h.r.<br>behind m3 | TD h.r.<br>p4-m1 | L Symph.     | APD<br>asc.r. | TD<br>condyle  | H condyle     | H<br>cor.ap. |
|--------------------------|----------------|----------------|---------------------|------------------|--------------|---------------|----------------|---------------|--------------|
| # 8096                   |                | 86.6           | 84.8                | 50.0             | 108.2        |               | 86.67          | (180)         |              |
| # 8661                   | 79.1           | 81.5           |                     |                  |              | 148.9         | 94.2           | 251.7         | (270)        |
| <i>S. etruscus</i>       |                |                |                     |                  |              |               |                |               |              |
| Min/Max/Mean [29]        | 65.0/91.0/82.8 | 70.0/96.5/85.8 | 79.0/105/90.8       | 41.0/60.0/48.9   | 94/123/110.3 | 115/152/143   | 77.5/107/90.5  | 182/243/218.7 | 254/268/261  |
| Senèze [31]              |                |                |                     |                  |              |               |                |               |              |
| Min/Max/Mean             | 88.0/77.9/82.0 | 89.5/92.3/91.1 | 91.5/93.8/92.9      | 46.9/47.4/47.1   | 97.30        |               | 89.1/89.7/89.5 | 241/242/241.5 |              |
| <i>S. hundsheimensis</i> |                |                |                     |                  |              |               |                |               |              |
| Min/Max/Mean [29]        | 78.0/105/89.8  | 78.0/104/90.6  | 79.0/108/94.3       | 42.0/62.5/51.3   | 91/126/108.1 | 128/169/153.8 | 78.0/100/92.6  | 230/292/249.8 | 285          |
| Isernia [31]             |                |                |                     |                  |              |               |                |               |              |
| Min/Max/Mean             | 80.4/93.4/86.3 | 81.6/91.4/88.1 | 92.3/92.6/92.5      | 48.7             | 107.2        |               | 86.1           |               |              |
| Ponte Galeria [6, 78]    | 86.0           | 84.0           | 86.0                | 52.0             | 98.0         |               |                |               |              |
| Hundsheim [34]           |                |                | 60.0                |                  | 103.0        |               | 79.0           | 178.0         |              |
| <i>S. hemitoechus</i>    |                |                |                     |                  |              |               |                |               |              |
| Min/Max/Mean [29]        | 75.0/115/95.0  |                | 79.0/124/100.8      | 44.0/71.0/56.3   |              |               |                | 232/276/250.5 |              |
| Neumark Nord [12]        | 108.5          | 104.5          | 108.9               |                  | 138.4        | 177.8         | 114.3          | 293.3         |              |
|                          | 106.3          | 104.6          | 108.5               |                  |              | 179.0         | 114.3          | 297.9         |              |

**Table S3.** Dimensions of the upper dentition of *S. hundsheimensis* from Cova del Rinoceront compared with some other remains of *Stephanorhinus*. Abbreviations: L, maximum length; EM3, length of the ectometaloph of M3; Max, maximum; Min, minimum; W, maximum width. \*Deciduous tooth (DP4).

|                         | LP2           | WP2           | LP3           | WP3           | LP4            | WP4           |               |
|-------------------------|---------------|---------------|---------------|---------------|----------------|---------------|---------------|
| # 8096                  |               |               | >30.0         | -             | 41.5           | 53.2          |               |
| # 8661                  |               |               |               |               | 59.7*          | 58.0*         |               |
| <i>S. etruscus</i>      |               |               |               |               |                |               |               |
| Min/Max/Mea             | 32.5/35.0/33. | 33.0/40.5/37. | 41.0/43.5/42. | 43.5/52.5/49. | 42.0/49.0/46.4 | 52.5/57.5/55. |               |
| n [29]                  | 7             | 1             | 0             | 1             |                | 1             |               |
| Senèze [31]             |               |               |               |               |                |               |               |
| Min/Max/Mea             | 23.7/30.2/28. | 34.7/35.2/35. | 34.2/35.1/34. | 45.1/46.3/45. | 35.0/39.7/37.1 | 48.1/49.4/48. |               |
| n                       | 1             | 0             | 7             | 7             |                | 8             |               |
| <i>S. hundsheimensi</i> |               |               |               |               |                |               |               |
| Min/Max/Mea             | 33.0/45.0/37. |               | 38.0/47.5/42. | 45.0/58.0/51. | 43.5/54.0/47.5 | 47.5/61.5/55. |               |
| n [29]                  | 4             |               | 6             | 4             |                | 9             |               |
| Vallonnet [31]          |               |               |               |               |                |               |               |
| Min/Max/Mea             | 32.3/35.1/33. | 37.8/38.7/38. | 36.3/42.4/39. | 47.8/51.6/49. | 37.7/43.9/41.5 | 50.4/60.2/55. |               |
| n                       | 7             | 2             | 0             | 3             |                | 5             |               |
| Isernia [31]            |               |               |               |               |                |               |               |
| Min/Max/Mea             | 29.5/39.6/34. | 36.0/45.2/40. | 34.9/45.0/41. | 49.7/55.4/52. | 39.8/49.9/43.4 | 52.9/57.9/56. |               |
| n                       | 4             | 6             | 0             | 6             |                | 1             |               |
| <i>S. hemitoechus</i>   |               |               |               |               |                |               |               |
| Min/Max/Mea             |               |               | 34.0/49.0/41. | 43.0/57.0/48. |                | 50.0/61.5/55. |               |
| n [29]                  |               |               | 8             | 2             | 37.0/51.0/44.5 | 0             |               |
| Caune de                | 29.0/38.0/33. | 27.0/44.0/36. |               |               |                |               |               |
| l'Arago [31]            | 6             | 0             |               |               |                |               |               |
| Min/Max/Mea             |               |               | 36.3/41.0/38. | 51.9/54.8/53. | 42.7/52.5/47.4 | 60.5/61.5/61. |               |
| n                       |               |               | 6             | 4             |                | 0             |               |
|                         | LM1           | WM1           | LM2           | WM2           | LM3            | WM3           | EM3           |
| # 8096                  |               |               | -             | (60)          | 55.3           | 55.0          | 60.3          |
| <i>S. etruscus</i>      |               |               |               |               |                |               |               |
| Min/Max/Mea             | 45.0/54.0/49. | 50.5/57.5/54. | 49.0/53.0/51. | 53.0/57.5/55. | 44.0/47.5/46.  | 51.0/53.0/51. | 52.5/54.0/53. |
| n [29]                  | 6             | 8             | 4             | 7             | 1              | 8             | 3             |
| Senèze [31]             |               |               |               |               |                |               |               |
| Min/Max/Mea             | 41.9/45.3/43. | 50.5/52.1/51. | 48.5/51.9/50. | -/-/-         | 49.5/52.9/51.  | 42.9/43.9/43. | 53.8/55.8/54. |
| n                       | 6             | 3             | 0             |               | 8              | 2             | 4             |
| <i>S. hundsheimensi</i> |               |               |               |               |                |               |               |
| Min/Max/Mea             | 47.5/60.0/53. | 44.5/63.5/56. | 49.5/62.0/55. | 52.0/63.0/58. | 40.5/53.5/47.  | 43.0/60.0/51. | 45.0/64.0/54. |
| n [29]                  | 3             | 2             | 1             | 5             | 2              | 5             | 2             |
| Vallonnet [31]          |               |               |               |               |                |               |               |
| Min/Max/Mea             | 47.0/54.8/50. | 51.6/58.5/54. | 46.8/55.3/51. | 54.0/60.1/56. | 50.0/55.0/52.  | 39.1/49.8/47. | 50.7/55.4/53. |
| n                       | 5             | 9             | 8             | 7             | 2              | 2             | 3             |
| Isernia [31]            |               |               |               |               |                |               |               |
| Min/Max/Mea             | 46.7/53.0/50. | 57.0/61.9/59. | 53.0/56.4/54. | 60.6/67.4/62. | 45.5/55.2/50.  | 44.6/56.4/48. | 52.4/60.4/56. |
| n                       | 6             | 9             | 6             | 5             | 3              | 6             | 1             |
| <i>S. hemitoechus</i>   |               |               |               |               |                |               |               |
| Min/Max/Mea             | 48.0/63.5/54. | 52.5/65.0/58. | 54.5/66.5/59. | 56.0/70.0/62. | 41.5/64.0/53.  | 41.0/61.5/53. | 52.5/74.0/62. |
| n [29]                  | 7             | 3             | 9             | 0             | 0              | 3             | 7             |
| Caune de                |               |               |               |               |                |               |               |
| l'Arago [31]            |               |               |               |               |                |               |               |
| Min/Max/Mea             | 49.9/55.5/52. | 58.8/62.8/60. | 50.9/57.2/54. | 60.8/66.9/63. | 52.8/65.8/59.  | 46.1/59.2/52. | 58.7/73.2/65. |
| n                       | 5             | 8             | 8             | 6             | 9              | 4             | 9             |

**Table S4.** Dimensions of the lower dentition of *S. hundsheimensis* from Cova del Rinoceront compared with some other remains of *Stephanorhinus*. Abbreviations: L, maximal length; Max, maximum; Min, minimum; W, maximal width.

|                          | <b>Lp2</b>     | <b>Wp2</b>       | <b>Lp3</b>     | <b>Wp3</b>     | <b>Lp4</b>     | <b>Wp4</b>     |
|--------------------------|----------------|------------------|----------------|----------------|----------------|----------------|
| # 8096                   | 27.6           | 20.4             | 38.7           | 27.2           |                |                |
| # 8661                   | 26.7           | 16.4             | 32.6           | 20.9           | 35.6           | 24.0           |
| <i>S. etruscus</i>       |                |                  |                |                |                |                |
| Min/Max/Mean [29]        | 29/31/30.4     | 17/22/19.4       | 37.5           | 23.0           |                |                |
| Senèze [31]              |                |                  |                |                |                |                |
| Min/Max/Mean             | 25.7/27.3/26.5 | 17.4 /17.8 /17.6 | 31.2/38.6/33.6 | 25.0/28.6/26.2 | 34.4/35.0/34.9 | 29.3/30.6/29.9 |
| <i>S. hundsheimensis</i> |                |                  |                |                |                |                |
| Min/Max/Mean [29]        | 30.0/33.0/31.3 | 17.0/22.5/20.3   | 35.0/38.5/36.5 | 22.5/26.0/24.6 | 38.0/49.5/42.8 | 24.0/31.0/27.3 |
| Vallonnet [31]           |                |                  |                |                |                |                |
| Min/Max/Mean             | 27.4/32.2/29.2 | 18.5/19.1/19.0   | 31.2/35.6/33.5 | 23.2/26.3/24.9 | 34.0/37.0/35.7 | 26.4/30.0/26.4 |
| Isernia [31]             |                |                  |                |                |                |                |
| Min/Max/Mean             | 25.2/30.4/28.0 | 19.5/21.0/20.1   | 32.7/37.5/34.3 | 22.0/28.4/24.7 | 36.7/40.2/38.3 | 21.2/32.7/27.1 |
| <i>S. hemitoechus</i>    |                |                  |                |                |                |                |
| Min/Max/Mean [29]        | 26.5/34.0/30.2 | 15.0/21.0/18.8   | 33.0/46.0/38.5 | 22.5/30.0/24.9 | 36.0/48.5/43.8 | 24.0/31.0/28.4 |
| Caune de l'Arago [31]    | 24.5/32.3/28.8 | 15.3/21.4/18.4   | 31.6/36.8/34.8 | 24.7/28.3/26.0 | 35.1/42.0/38.7 | 28.4/31.8/30.3 |
| Min/Max/Mean             |                |                  |                |                |                |                |
|                          | <b>Lm1</b>     | <b>Wm1</b>       | <b>Lm2</b>     | <b>Wm2</b>     | <b>Lm3</b>     | <b>Wm3</b>     |
| # 8096                   |                |                  |                |                | 48.5           | 31.1           |
| # 8661                   | 42.4           | 27.5             | 47.0           | 27.9           |                |                |
| <i>S. etruscus</i>       |                |                  |                |                |                |                |
| Min/Max/Mean [29]        | 36.0/50.0/43.7 | 26.5/32.0/29.0   | 40.0/54.0/48.4 | 27.5/34.0/30.2 | 43.0/52.0/48.1 | 27.0/31.0/29.1 |
| Senèze [31]              |                |                  |                |                |                |                |
| Min/Max/Mean             | 40.8/45.3/42.5 | 25.5/30.5/28.3   | 41.6/43.2/42.6 | 28.5/29.5/29.0 | 42.6/43.2/42.9 | 27.6/28.7/28.2 |
| <i>S. hundsheimensis</i> |                |                  |                |                |                |                |
| Min/Max/Mean [29]        | 40.0/56.0/45.5 | 26.0/37.0/29.9   | 42.0/54.0/49.3 | 28.0/35.0/31.0 | 45.0/60.5/51.0 | 25.5/34.0/30.0 |
| Vallonnet [31]           |                |                  |                |                |                |                |
| Min/Max/Mean             | 38.2/47.3/42.4 | 25.5/31.2/28.7   | 40.2/47.2/44.5 | 26.0/32.3/29.6 | 45.1/45.7/45.3 | 26.5/28.5/27.8 |
| Isernia [31]             |                |                  |                |                |                |                |
| Min/Max/Mean             | 40.1/48.0/43.6 | 28.0/38.6/31.5   | 41.3/50.1/46.9 | 29.4/36.6/31.6 | 40.8/51.6/45.7 | 27.3/31.3/29.0 |
| <i>S. hemitoechus</i>    |                |                  |                |                |                |                |
| Min/Max/Mean [29]        | 38.5/56.5/49.1 | 26.0/32.5/29.3   | 42.5/60.5/52.8 | 25.5/34.0/30.7 | 48.0/71.5/57.1 | 27.0/34.5/31.1 |
| Caune de l'Arago [31]    | 40.4/47.8/43.7 | 26.3/33.4/30.8   | 46.2/53.2/50.1 | 25.8/35.5/31.3 | 46.8/55.1/51.2 | 27.1/33.7/30.9 |
| Min/Max/Mean             |                |                  |                |                |                |                |

**Table S5.** Dimensions of the humerus of *S. hundsheimensis* from Cova del Rinoceront compared with other remains of *Stephanorhinus*.

Abbreviations: APD, anteroposterior diameter; Delt. tub., deltoid tuberosity; prox., proximal; Max, maximum; Min, minimum; TD, transversal diameter.

|                          | Length      | Prox. TD     | Prox. APD    | TD Delt. tub. | TD diaphysis  | APD diaphysis | Distal TD     | Distal APD    |
|--------------------------|-------------|--------------|--------------|---------------|---------------|---------------|---------------|---------------|
| # 8096                   | 378.0       | 158.0        | 162.0        | 140.0         | 68.0          | 61.0          | 126.0         | 105.0         |
| <i>S. etruscus</i>       |             |              |              |               |               |               |               |               |
| Min/Max/Mean             | 336/427/387 | 125/202/142. | 117/155/143. | 96.0/135/116. | 62.0/70.0/65. | 54.0/72.0/63. | 110/137/122.8 | 83.5/114/101. |
| [29]                     | .7          | 8            | 6            | 4             | 0             | 5             |               | 8             |
| Valdarno [31]            | 384.0       | 133.0        | 160.0        | 123.0         | 59.0          |               | 122.0         |               |
| Senèze [31]              | 386.0       | 158.0        | 131.8        | 131.4         | 65.3          | 62.2          | 126.1         | 106.2         |
| <i>S. hundsheimensis</i> |             |              |              |               |               |               |               |               |
| Min/Max/Mean             | 363/393/382 | 135/150/141. | 141/146/155. |               | 50.0/70.0/59. | 55.0/77.0/64. | 118.0/145.0/1 | 94.0/116.5/10 |
| [29]                     | .2          | 6            | 3            | 129.0         | 9             | 3             | 28.7          | 6.4           |
| Vallonnet [31]           |             |              |              |               |               |               |               |               |
| Min/Max/Med              |             |              |              | 114.1         | 64.6/68.5/65. | 51.9/66.5/58. | 126.9/128.4/1 | 101.4/104.6/1 |
| [31]                     |             |              |              |               | 5             | 9             | 27.7          | 03.2          |
| Soleilhac [31]           | 380.0       | 193.4        | 137.0        | 117.9         | 58.3          | 59.6          | 120.0         | 106.7         |
|                          | 382.0       | 133.7        | 159.0        |               | 59.0          | 56.3          | 116.9         |               |
| Hundsheim [34]           | 445.0       | 185.0        | 155.0        |               | 67.5          | 60.0          | 134.0         | 115.0         |
| <i>S. hemitoechus</i>    |             |              |              |               |               |               |               |               |
| Min/Max/Mean             | 341/425/394 | 129/182/160. | 128/153/143. | 117/150/138.  | 58/79/68.4    | 64/83/74.5    | 117.5/158/140 | 91/122/107.3  |
| [29]                     | .7          | 9            | 8            | 2             |               |               | .6            |               |
| Valle Radice [11]        | 416.9       | 180.2        | 155.0        | 146.3         | 65.6          | 72.5          | 144.3         | 116.0         |
|                          | 410.5       | 178.5        | 148.3        | 134.1         | 63.8          | 68.2          | 138.6         | 113.0         |
| Melpignano [10]          | 385.0       | 162.0        | 135.0        | 141.0         | 61.0          | 63.0          | 142.0         | 110.0         |

**Table S6.** Dimensions of the femur of *S. hundsheimensis* from Cova del Rinoceront compared with other remains of *Stephanorhinus*.

Abbreviations: ep., epiphysis; Max, maximum; Min, minimum; TD, transversal diameter.

|                          | Length        | Proximal TD   | Proximal APD   | TD 3rd trochanter | TD diaphysis   | APD diaphysis  | Distal TD         | Distal APD      |
|--------------------------|---------------|---------------|----------------|-------------------|----------------|----------------|-------------------|-----------------|
| # 8661                   |               |               |                |                   |                |                | (120)             |                 |
| # 8096                   | 431.0         | 194.0         | 80.8           | 131.0             | 69.0           | 49.8           | -                 | 127.4           |
| <i>S. etruscus</i>       |               |               |                |                   |                |                |                   |                 |
| Min/Max/Me an [29]       | 406/474/441.9 | 145/187/163.4 | 66.0/83.0/76.5 | 101/140.5/121.5   | 48.0/69.0/59.6 | 47.0/65.5/53.9 | 115.0/135.0/124.1 | 125/161/143.7   |
| Upper Valdarno [31]      |               |               |                |                   |                |                |                   |                 |
| Min/Max/Me an            | 442/450/446.3 | 150/169/159.3 | 66.0/82.0/71.5 | 109/136/121.7     | 50.0/65.0/58.3 |                | 115.0/131.0/122.3 | 119/150/139.0   |
| Senèze [31]              | 457.0         | 154.0         | 75.5           | 138.0             | 68.8           | 49.0           | 129.2             | 138.9           |
|                          | 443.0         | 157.0         | 76.3           |                   | 67.8           | 50.5           | 129.1             | 132.0           |
| <i>S. hundsheimensis</i> |               |               |                |                   |                |                |                   |                 |
| Min/Max/Me an [29]       | 406/472/439.1 | 158/186/173.2 | 72.0/88.0/79.9 | 107/142/125.4     | 49.0/72.0/62.0 | 45.0/61.5/52.4 | 116.0/140.5/126.3 | 139.5/163/149.6 |
| Hundsheim [34]           | 495.0         | 184.0         | 89.0           |                   | 74.0           | 54.0           | 142.0             | 134.0           |
| Untermassfeld [49]       | 496.0         |               | 90.0           |                   | 69.0           | 52.5           | 141.5             | 161.0           |
|                          | 507.5         |               | 86.8           |                   | 74.4           | 53.3           | 143.0             | 162.0           |
|                          | 490.8         |               | 86.0           |                   | 63.0           | 62.1           | 144.2             | 164.3           |
| <i>S. hemitoechus</i>    |               |               |                |                   |                |                |                   |                 |
| Min/Max/Me an [29]       | 434/503/461.8 | 180/211/190.4 | 80.5/94.0/88.8 | 123/163/140.0     | 63.0/79.0/70.2 | 50.0/65.0/56.9 | 124.0/149.0/135.5 | 121/172/155.3   |
| Caune de l'Arago [31]    |               |               |                |                   |                |                | 124.4/151.3/134.9 | 178.3           |

**Table S7.** Dimensions of the radius of *S. hundsheimensis* from Cova del Rinoceront compared with other remains of *Stephanorhinus*.

Abbreviations: APD, anteroposterior diameter; art., articulation; Max., maximum; Min., minimum; TD, transversal diameter.

|                          | Length            | Proximal TD       | Proximal APD       | TD diaphysis       | APD diaphysis      | Distal TD          | Distal APD         | TD Distal art.     | APD Distal art.    |
|--------------------------|-------------------|-------------------|--------------------|--------------------|--------------------|--------------------|--------------------|--------------------|--------------------|
| # 8096                   | 370.0             | 90.3              | 60.9               | 50.8               | 36.6               | 90.0               | 61.8               | 77.0               | 37.4               |
| <i>S. etruscus</i>       |                   |                   |                    |                    |                    |                    |                    |                    |                    |
| Min/Max/Mean [29]        | 342/415/37<br>3.5 | 77.5/94/86.<br>1  | 50.5/65/57.<br>5   | 40/56/47.6         | 30/42/36.0         | 79/93.5/86.<br>9   | 49/63/57.4         | 73.5/76.5/7<br>4.8 | 38.5/41/39.<br>8   |
| <i>S. hundsheimensis</i> |                   |                   |                    |                    |                    |                    |                    |                    |                    |
| Min/Max/Mean [29]        | 358/404/38<br>0   | 80.0/112/97<br>.6 | 57.0/80.0/6<br>6.0 | 45.0/64.0/5<br>2.6 | 33.0/53.0/3<br>9.9 | 86.0/102/94<br>.0  | 54.0/65.5/5<br>9.5 | 75.0/83/77.<br>9   | 43.0/47.0/4<br>5.3 |
| Vallonnet [31]           | 374/380/37        | 85.9/95.4/9       | 58.7/69.6/6        | 44.9/51.5/4        | 33.2/35.5/3        | 92.2/93.0/9        | 56.1/60.9/5        | 72.4/79.6/7        | 47.2/52.5/4        |
| Min/Max/Mean             | 7                 | 1.9               | 3.4                | 8.9                | 4.6                | 2.6                | 8.6                | 6.4                | 9.4                |
| Hundsheim [34]           | 400.0             | 103.5             | 67.5               | 51.0               | 4.0                | 100.5              | 59.0               |                    |                    |
|                          | 399.0             | 99.5              | 68.0               | 50.0               | 34.0               | 109.8              | 69.6               | 84.0               | 48.5               |
| Voigtstedt [45]          | 398.5             | 99.3              | 68.0               | 49.5               | 36.5               | 106.5              | 69.0               | 84.0               | 48.0               |
|                          | 393.0             | 98.8              | 68.5               | 52.8               | 33.5               | 107.5              | 67.8               | 89.8               | 48.2               |
| <i>S. hemitoechus</i>    |                   |                   |                    |                    |                    |                    |                    |                    |                    |
| Min/Max/Med [29]         | 341/399/37<br>1.7 | 88.5/105/95<br>.6 | 59.0/69.5/6<br>3.8 | 49.0/60.0/5<br>5.1 | 34.0/46.5/3<br>8.3 | 91.5/111/10<br>2.9 | 59.0/72.0/6<br>4.6 | 77.0/80.0/7<br>8.8 | 44.5/45.0/4<br>4.8 |
| Villavieja [3]           | (387.6)           | 91.3              | 63.8               | 48.9               | 37.4               | >84                |                    |                    |                    |
| Los Rosales [3]          | 371.0             | 110.7             | 77.0               | 61.0               | 35.2               | 116.6              | 69.0               | 95.2               |                    |

**Table S8.** Dimensions of the tibia of *S. hundsheimensis* from Cova del Rinoceront compared with other remains of *Stephanorhinus*.

Abbreviations: APD, anteroposterior diameter; Prox., proximal; Max, maximum; Min, minimum; TD, transversal diameter.

|                          | Length          | Proximal TD       | Proximal APD      | TD diaphysis   | APD diaphysis  | Distal TD       | Distal APD     |
|--------------------------|-----------------|-------------------|-------------------|----------------|----------------|-----------------|----------------|
| # 8661                   |                 | (110)             | (105)             |                |                |                 |                |
| # 8096                   | 325.0           | 115.0             | 126.1             | 57.5           | 53.6           | 113.0           | 73.0           |
| <i>S. etruscus</i>       |                 |                   |                   |                |                |                 |                |
| Min/Max/Mean [29]        | 334/389/357.0   | 101.0/115.0/109.5 | 95.0/117.5/107.4  | 43.0/61.5/53.0 | 43.0/63.0/51.3 | 80.0/105.0/90.7 | 58.0/72.0/64.3 |
| Senèze [31]              | 378.0           | 114.2             | 109.6             | 55.5           | 50.5           | 87.3            | 72.7           |
|                          | 378.0           | 114.6             | 110.9             | 55.8           | 48.0           | 94.3            | 73.3           |
| <i>S. hundsheimensis</i> |                 |                   |                   |                |                |                 |                |
| Min/Max/Mean [29]        | 343/394.5/369.7 | 103.0/123.5/113.4 | 100.0/126.0/111.6 | 46.0/68.0/56.9 | 43.0/65.5/52.3 | 81.0/103.5/92.8 | 60.5/73.0/67.4 |
| Hundsheim [34]           | 398.0           | 125.0             | 132.0             | 60.0           | 61.0           | 110.0           | 74.0           |
| Soleilhac [31]           |                 |                   |                   |                |                |                 |                |
| Min/Max/Mean             | 358/360/359.0   | 109.2/117.0/114.0 | 112.8/115.3/114.1 | 50.6/51.9/51.2 | 46.2/49.6/47.9 | 90.5/92.4/91.4  | 61.4/64.4/63.3 |
| Vallonet [31]            |                 |                   |                   | 51.4/56.3/54.6 | 48.3/48.5/48.4 | 84.1/91.7/88.1  | 60.8/69.0/63.6 |
| Pietrafitta [31]         | 363.0           | 111.0             | 116.0             | 50.3/55.5/52.9 | 35.3/48.0/41.7 | 87.8/105.0/96.4 | 57.0           |
| Untermassfeld [49]       | 402.5           | 123.0             | 126.5             | 56.9           | 52.4           | 105.8           | 75.3           |
|                          | 401.7           | 133.8             | 127.0             | 64.0           | 56.5           | 112.1           | 77.2           |
|                          | 395.5           | 132.0             | 133.3             | 57.0           | 49.1           | 111.2           | 72.5           |
|                          | 413.3           | 120.3             |                   | 58.0           | 51.0           | 104.3           | 72.8           |
| Voigtstedt [45]          | 390.5           | 128.5             | 123.0             | 60.0           | 50.8           | 105.5           | 72.8           |
|                          | 392.0           | 130.0             | 123.5             | 60.0           | 51.5           | 102.5           | 73.0           |
|                          | 397.8           | 122.5             | 125.8             | 56.8           | 50.8           | 103.8           | 76.8           |
|                          | 397.5           | 121.0             | 124.9             | 56.0           | 50.6           | 103.0           | 75.5           |
| <i>S. hemitoechus</i>    |                 |                   |                   |                |                |                 |                |
| Min/Max/Mean [29]        | 321/400/358.9   | 101/137.5/121.3   | 100/130/123.6     | 52.0/70.0/60.0 | 47.0/63.0/55.5 | 85.0/114.0/98.4 | 57.0/87.0/73.1 |
| Lunel-Viel [31]          | 355.0           |                   |                   | 53.2/55.7/54.9 | 50.4/53.5/51.8 | 96.4/97.2/96.8  | 62.2/71.0/66.1 |
| Melpignano [10]          | 318.0           | 102.0             | 105.0             | 49.0           | 41.0           | 80.0            | 63.0           |
| Alfaguara [3]            | 330.5           | 97.4              | (78.0)            | 49.0           | 44.4           | 80.3            | 58.3           |



**Table S9.** Dimensions of the scaphoid of *S. hundsheimensis* from Cova del Rinoceront compared with other remains of *Stephanorhinus*.

Abbreviations: APD, anteroposterior diameter; art., articulation; prox., proximal; Max, maximum; Min, minimum; TD, transversal diameter.

|                          | Length         | Width          | Height         | TD Prox. art.  | APD Prox. art. | TD Distal art. | APD Distal art. |
|--------------------------|----------------|----------------|----------------|----------------|----------------|----------------|-----------------|
| # 8096                   | 77.4           | 58.2           | 67.3           | 48.9           | 44.2           | 61.0           | 28.1            |
| <i>S. etruscus</i>       |                |                |                |                |                |                |                 |
| Min/Max/Mean [29]        | 67.0/82.5/73.2 | 41.0/51.0/46.5 | 52.5/65.0/57.9 | 42.0/48.0/45.7 | 40.0/49.0/45.8 | 55.0/65.0/61.3 | 25.0/31.0/27.6  |
| Valdarno [60]            | 72.0/79.0/73.9 | 44.0/52.0/48.7 | 54.0/62.0/56.9 | 31.0/35.0/33.9 | 36.0/50.0/44.9 | 49.0/55.0/52.2 | 25.0/28.0/27.1  |
| <i>S. hundsheimensis</i> |                |                |                |                |                |                |                 |
| Min/Max/Mean [29]        | 65.0/82.5/77.0 | 42.0/55.5/48.3 | 55.0/68.5/60.9 | 41.0/59.0/49.7 | 39.0/51.0/45.4 | 57.5/68.0/62.6 | 25.0/34.0/28.8  |
| Vallonnet [31]           | 64.7/71.0/68.8 | 44.3/55.2/49.9 | 53.2/66.2/57.8 | 44.2/47.4/46.2 | 47.4/50.8/49.1 | 60.3/65.2/62.7 | 27.1/24.9/26.0  |
| Untermassfeld [49]       | 72.8/84.0/78.5 | 51.6/60.2/55.7 | 54.3/73.6/66.4 | 46.2/52.0/49.7 | 49.0/56.0/53.6 | 62.5/76.0/70.1 | 28.5/35.3/32.4  |
| <i>S. hemitoechus</i>    |                |                |                |                |                |                |                 |
| Min/Max/Mean [29]        | 71.5/86/78.1   | 43.5/56.5/50.4 | 62.5/75/68.8   | 43/63/51.1     | 44/54/47.9     | 55/72/65.1     | 26.5/36/29.7    |
| Lunel Viel [79]          | 77.8           | 52.0           | 61.4           | 51.8           | (47)           | 56.5           | 27.5            |
| Cova del Gegant [60]     | 68.0           | (45.0)         | 54.9           | 40.0           | —              | 59.5           | 29.0            |
| Atapuerca [3]            | 70.6           |                | (60)           | 43.7           | 40             |                |                 |
| Valle Radice [11]        | 82.8           | 55.7           | 64.5           | 53.5           | 52.0           | 59.5           | 36.5            |
|                          | 83.2           | 55.0           | 58.6           | 52.4           | 51.2           | 56.5           | 35.8            |

**Table S10.** Dimensions of the semilunate of *S. hundsheimensis* from Cova del Rinoceront compared with other remains of *Stephanorhinus*.

Abbreviations: Max, maximum; Min, minimum.

|                          | <b>Length</b>  | <b>Width</b>   | <b>Height</b>  | <b>Anatomical Height</b> |
|--------------------------|----------------|----------------|----------------|--------------------------|
| # 8096                   | 68.0           | 47.5           | 50.2           | 43.3                     |
| <i>S. etruscus</i>       |                |                |                |                          |
| Min/Max/Mean [29]        | 56.0/68.0/62.2 | 35.0/52.5/44.3 | 43.5/51.5/48.0 | 51.5/52.0/51.7           |
| Min/Max/Mean [30]        | 59.0/70.0/62.0 | 43.0/51.0/46.6 | 43.0/49.0/45.8 | 46.0/ 50.0/48.0          |
| <i>S. hundsheimensis</i> |                |                |                |                          |
| Min/Max/Mean [29]        | 60.0/74.0/67.4 | 42.0/52.5/48.0 | 43.5/56.5/49.5 | 43.5/58.0/50.5           |
|                          | 73.6           | 48.0           | 53.7           | 54.1                     |
| Isernia [31]             | 62.8           | 43.8           | 45.3           | 46.0                     |
| Soleilhac [31]           | 62.3           | 44.2           | 44.6           | 45.9                     |
|                          | 73.5           |                | 55.8           |                          |
| Voigtstedt [45]          | 72.8           |                | 51.0           |                          |
| Untermassfeld [49]       |                |                |                |                          |
| Min/Max/Mean             | 65.5/69.6/67.5 |                | 47.8/56.5/53.3 |                          |
| <i>S. hemitoechus</i>    |                |                |                |                          |
| Min/Max/Mean [29]        | 65/75/70.0     | 48/59/52.1     | 46/55/50.3     | 45/48/46.5               |
|                          | 71.0           | 48.4           | 51.7           | 47.9                     |
| Valle Radice [11]        | 69.2           | 56.2           | 56.6           | 53.5                     |
|                          | 71.4           | 48.7           | 48.3           | 48.1                     |
| La Cova del Gegant [79]  | 68             | 49             | 48             |                          |
| Atapuerca [45]           | 66             | 48.2           | 47             | 48.5                     |

**Table S11.** Dimensions of the pyramidal of *S. hundsheimensis* from Cova del Rinoceront compared with other remains of *Stephanorhinus*.

Abbreviations: APD, anteroposterior diameter; Max, maximum; Min, minimum; TD, transversal diameter.

|                          | <b>APD</b>     | <b>TD</b>      | <b>Height</b>  |
|--------------------------|----------------|----------------|----------------|
| # 8096                   | 38.4           | 49.9           | 53.6           |
| <i>S. etruscus</i>       |                |                |                |
| Min/Max/Mean [29]        | 32.0/40.0/36.0 | 41.0/56.5/49.9 | 42.0/55.0/49.2 |
| Min/Max/Mean [31]        | 31.0/36.0/34.0 | 44.0/49.0/46.2 | 47.0/50.0/48.4 |
| <i>S. hundsheimensis</i> |                |                |                |
| Min/Max/Mean [29]        | 31.5/40.0/36.5 | 49.0/56.5/53.4 | 45.0/54.0/50.3 |
| Vallonet [31]            | 35.8           | 46.9           | 43.3           |
|                          | 37.9           | 52.0           | 48.4           |
| Soleilhac [31]           | 39.6           | 45.6           | 48.6           |
|                          | 35.7           | 50.6           | 47.4           |
|                          | 35.2           | 51.7           | 50.4           |
| Isernia [46]             | 39.5           | 62.5           | 49             |
|                          |                | 51.0           | 54.3           |
| Voigtstedt [45]          |                | 49.6           | 54.8           |
| Untermassfeld [49]       |                |                |                |
| Min/Max/Mean             |                | 41.0/54.0/47.4 | 41.2/56.8/48.8 |
| <i>S. hemitoechus</i>    |                |                |                |
| Min/Max/Mean [29]        | 35.5/46.0/40.6 | 47.0/60.0/52.9 | 48.0/63.0/55.1 |
|                          | 44.1           | 57.8           | 50.7           |
| Caune de l' Arago [31]   | 45.6           | 61.5           | 55.8           |
|                          | 46.2           | 50.6           | 59.6           |
| Valle Radice [11]        | 46.1           | 49.5           | 52.2           |
| La Cova del Gegant [60]  | 41.0           | 43.0           | 47.0           |
| Atapuerca [3]            | 34.4           | 44.9           | 47.0           |

**Table S12.** Dimensions of the pisiform of *S. hundsheimensis* from Cova del Rinoceront compared with some other remains of *Stephanorhinus*.

Abbreviations: Max, maximum; Min, minimum.

|                          | <b>Length</b>  | <b>Width</b>   | <b>Height</b>  |
|--------------------------|----------------|----------------|----------------|
| # 8096                   | 61.3           | 33.1           | 25.7           |
| <i>S. etruscus</i>       |                |                |                |
| Min/Max/Mean [29]        | 58.0/60.0/59.0 | 25.0/27.0/26.1 | 35.5/40.5/38.2 |
| <i>S. hundsheimensis</i> |                |                |                |
| Min/Max/Mean [29]        | 46.0/68.5/60.7 | 22.0/29.0/26.4 | 35.0/46.0/39.8 |
| Isernia [60]             | 68.8           | 42.5           | 30.0           |
| Soleilhac [31]           | 56.8           | 37.9           | 25.0           |
| Süssenborn [48]          | 72.4           | 49.7           |                |
|                          | 71.8           | 38.2           |                |
| Voigtstedt [45]          | 63.5           | 42.6           |                |
|                          | 65.5           | 43.3           |                |
| Untermassfeld [49]       |                |                |                |
| Min/Max/Mean             | 55.2/68.3/64.7 | 25.8/31.8/29.2 |                |
| <i>S. hemitoechus</i>    |                |                |                |
| Min/Max/Mean [29]        | 59.0/66.0/62.9 | 23.0/28.0/26.0 | 36.0/42.0/39.9 |
| Caune de l'Arago [31]    |                |                |                |
| Min/Max/Mean             | 58.5/63.6/64.7 | 35.5/42.1/38.4 | 20.8/22.7/21.8 |
| Valle Radice [11]        | 62.2           | 32.0           | 27.0           |
| La Cova del Gegant [60]  | 54.0           | 24.0           | 37.0           |

**Table S13.** Dimensions of the trapezoid of *S. hundsheimensis* from Cova del Rinoceront compared with other remains of *Stephanorhinus*.

Abbreviations: Max, maximum; Min, minimum.

|                          | <b>Length</b>  | <b>Width</b>   | <b>Height</b>  |
|--------------------------|----------------|----------------|----------------|
| # 8096                   | 36.8           | 27.0           | 28.2           |
| <i>S. etruscus</i>       |                |                |                |
| Min/Max/Mean [29]        | 35.0/40.0/37.9 | 22.0/32.0/27.5 | 25.5/36.0/30.4 |
|                          | 37.5           | 26.1           | 32.0           |
| Pietrafitta [61]         | 38.1           | 25.5           | 30.0           |
|                          | 35.8           | 25.2           | 33.4           |
| Crespià [61]             | 32.0           | 21.4           | 28.1           |
| <i>S. hundsheimensis</i> |                |                |                |
| Min/Max/Mean [29]        | 37.5/45.0/41.1 | 25.0/28.0/26.4 | 33.5/37.5/35.4 |
| Vallonnet [31]           | 46.4           | 28.4           | 34.2           |
| Isernia [31]             | 40.1           | 26.5           | 31.5           |
| <i>S. hemitoechus</i>    |                |                |                |
| Min/Max/Mean [29]        | 32.0/42.5/38.4 | 25.0/32.0/28.3 | 25.0/37.0/31.0 |
| Caune de l'Arago [31]    |                |                |                |
| Min/Max/Mean             | 32.5/41.3/37.7 | 23.9/28.2/26.0 | 24.2/29.7/28.4 |
|                          | 35.8           | 27.1           | 27.7           |
| Orgnac 3 [31]            | 37.5           | 26.0           | 28.2           |
| Valle Radice [11]        | 41.7           | 31.7           | 34.5           |
| La Cova del Gegant [60]  | 35.5           | 26.0           | 29.0           |

**Table S14.** Dimensions of the magnum of *S. hundsheimensis* from Cova del Rinoceront compared with other remains of *Stephanorhinus*.

Abbreviations: H, height; Max, maximum; Min, minimum.

|                          | <b>Length</b>  | <b>Width</b>   | <b>Max. Height</b> |
|--------------------------|----------------|----------------|--------------------|
| # 8096 right             | 90.9           | 45.0           | 64.0               |
| left                     |                | 43.0           | 58.6               |
| <i>S. etruscus</i>       |                |                |                    |
| Min/Max/Mean [29]        | 77.0/89.0/83.3 | 38.0/48.5/44.1 | 54.0/66.0/58.6     |
| Senèze [31]              | 84.2           | 46.2           |                    |
| <i>S. hundsheimensis</i> |                |                |                    |
| Min/Max/Mean [29]        | 79.0/95.0/88.5 | 40.0/50.0/45.7 | 56.0/65.5/60.8     |
| Soleilhac [31]           | 86.1           | 46.4           | 58.5               |
| Isernia [31]             |                | 49.2           | 63.8               |
|                          | 99.1           | 48.5           | 69.0               |
|                          | 85.0           | 52.0           | 65.3               |
| Untermasfeld [49]        | 87.2           | 48.6           | 64.5               |
|                          | 102.5          | 49.7           | 73.6               |
|                          | 95.4           | 49.4           | 63.5               |
| <i>S. hemitoechus</i>    |                |                |                    |
| Min/Max/Mean [29]        | 75.5/91.0/83.6 | 35.0/50.0/42.5 | 55.0/65.0/59.6     |
| Caune de l'Arago [31]    | 75.2           | 44.7           | 57.4               |
| Valle Radice [78]        | 94.6           | 48.0           | 65.3               |
| La Cova del Gegant [60]  | 83.0           | 44.0           | 58.0               |
| Lezetxiki [3]            | 88.6           | 42.2           | 63.2               |

**Table S15.** Dimensions of the unciform of *S. hundsheimensis* from Cova del Rinoceront compared with other remains of *Stephanorhinus*.

Abbreviations: Max, maximum; Min, minimum.

|                          | <b>Max. Length</b> | <b>Anatomical Length</b> | <b>Width</b>   | <b>Height</b>  |
|--------------------------|--------------------|--------------------------|----------------|----------------|
| # 8096                   | 87.2               | 71.7                     | 65.7           | 51.3           |
| <i>S. etruscus</i>       |                    |                          |                |                |
| Min/Max/Mean [29]        | 75.0/87.5/81.9     | 53.0/67.0/59.5           | 55.5/73.0/60.7 | 44.0/52.0/46.7 |
| Senèze [31]              | 79.6               | 61.8                     | 60.8           | 46.4           |
|                          | 80.5               | 62.8                     | 61.2           | 43.4           |
| <i>S. hundsheimensis</i> |                    |                          |                |                |
| Min/Max/Mean [29]        | 78.0/94.0/84.8     | 55.0/71.5/63.7           | 60.0/70.0/65.7 | 46.0/55.0/51.9 |
| Soleilhac [31]           | 88.5               | 72.0                     | 59.2           | 46.9           |
| Isernia [46]             | 90.3               | 64.7                     | 64.3           | 53.2           |
|                          | 88.5               | 72.0                     | 68.0           | 52.5           |
| <i>S. hemitoechus</i>    |                    |                          |                |                |
| Min/Max/Mean [29]        | 73.5/92.0/86.4     | 52.5/76.0/63.8           | 58.0/76.0/67.1 | 47.0/55.0/51.4 |
|                          |                    |                          | 67.4           | 51.9           |
| Caune de l'Arago [31]    |                    |                          | 62.5           | 47.1           |
|                          |                    |                          | 66.2           | 51.3           |
| Melpignano [10]          | 84                 | 58                       | 65             | 48             |
| La Cova del Gegant [60]  | 85.5               | 58.5                     | 62             | 59             |
| Atapuerca [3]            | 73.8               | 59.4                     | 59.6           | 46             |

**Table S16.** Dimensions of the Mc II of *S. hundsheimensis* from Cova del Rinoceront compared with other remains of *Stephanorhinus*.

Abbreviations: APD, anteroposterior diameter; Art., articulation; diaph., diaphysis; L, length; Max, maximum; Min, minimum; prox, proximal; TD, transversal diameter.

|                          | Length        | Prox. TD       | Prox. APD      | Diaphysis TD   | Diaphysis APD  | Max. Distal TD | Distal Art. TD | Distal Art. APD | 100 × TDdiaph/L |
|--------------------------|---------------|----------------|----------------|----------------|----------------|----------------|----------------|-----------------|-----------------|
| # 8096                   | 167.8         | 37.8           | 38.9           | 34.6           | 23.4           | 40.6           | 37.6           | 41.1            | 20.9            |
| <i>S. etruscus</i>       |               |                |                |                |                |                |                |                 |                 |
| Min/Max/Mean [29]        | 162/186/176   | 27/47/39.3     | 34/46.5/40.7   | 24/38/32.5     | 17/28/22.6     | 38/48/42.6     | 30/45.5/38.2   | 36/41/37.9      |                 |
| Upper Valdarno [31]      | 166.0         | 44.0           | 32.0           | 31.0           | 19.0           | 39.0           | 31.0           | 37.0            | 18.7            |
|                          | 173.0         | 43.0           | 39.0           | 33.0           |                | 40.0           | 33.0           | 37.0            | 19.1            |
| <i>S. hundsheimensis</i> |               |                |                |                |                |                |                |                 |                 |
| Min/Max/Mean [29]        | 174/194/181.6 | 39.5/49/44.5   | 37/45.5/42.9   | 30/41/35.6     | 20/28/23.3     | 42/49/45.2     | 34/43/38.6     | 36/41/39.5      |                 |
| Hundsheim [34]           | 190.0         | 44.0           | 48.0           | 39.0           | 20.0           | 40.0           |                | 43.5            | 20.5            |
| Soleilhac [31]           | 179.0         | 47.1           | 39.3           | 33.7           | 21.3           | 42.4           | 35.6           | 40.2            | 18.7            |
|                          | 192.0         | 41.8           | 42.2           | 35.2           | 20.5           | 44.1           | 40.4           | 38.6            | 18.3            |
| Isernia [31]             | 174.6         | 44.0           | 36.7           | 34.2           | 21.7           |                | 37.9           |                 | 19.5            |
| Untermassfeld [49]       | 189.2         | 55.8           | 45.5           | 39.6           | 25.4           | 50.2           | 39.5           | 45.5            | 20.9            |
|                          | 175.1         | 44.0           | 44.9           | 31.9           | 24.3           | 42.2           | 33.8           | 40.4            | 18.2            |
|                          | 184.1         | 50.7           | 46.8           | 39.7           | 27.0           | 50.5           | 42.9           | 45.5            | 21.5            |
| Voigtstedt [45]          | 196.1         | 48.0           | 41.8           | 35.5           |                | 46.2           | 38.0           |                 | 18.1            |
|                          | (198)         | 49.3           | 41.2           | 40.5           |                | 48.5           | 41.8           |                 |                 |
| <i>S. hemitoechus</i>    |               |                |                |                |                |                |                |                 |                 |
| Min/Max/Mean [29]        | 153/169/162.4 | 32.0/49.0/41.5 | 36.0/47.0/41.8 | 30.0/42.0/36.9 | 20.0/30.0/25.0 | 39.0/50.0/44.0 | 34.0/46.0/40.2 | 35.5/45.5/40.2  |                 |
| Lunel-Viel [79]          | 165.5         | 45.0           | 39.5           | 36.3           |                | 45.0           | 34.0           | 42.5            | 21.9            |
| La Cova del Gegant [60]  |               | 41.4           | 35.0           | 38.0           | 23.2           |                |                |                 |                 |
| Pinilla del Valle [3]    | 164.7         | 36.7           | 45.8           | 38.5           | 22.7           | 41.7           | 36.4           | 42.6            | 23.3            |
|                          | 165.0         | 38.0           | 44.3           | 33.6           | 21.8           | 42.3           | 35.5           | 40.5            | 20.3            |
| Melpignano [10]          | 130.0         | 33.0           | 33.0           | 28.0           | 17.0           | 33.0           | 27.0           | 35.0            | 21.5            |



**Table S17.** Dimensions of the Mc III of *S. hundsheimensis* from Cova del Rinoceront compared with other remains of *Stephanorhinus*. Abbreviations: APD, anteroposterior diameter; Art., articulation; diaph., diaphysis; L, length; Max, maximum; Min, minimum; prox, proximal; TD, transversal diameter.

|                              | Length        | Prox. TD   | Prox. APD  | Diaphysis TD | Diaphysis APD | Max. Distal TD | Distal Art. TD | Distal Art. APD | 100 × TD diaph /L |
|------------------------------|---------------|------------|------------|--------------|---------------|----------------|----------------|-----------------|-------------------|
| # 8096 left                  | 196.8         | 53.6       | 46.4       | 51.0         | 18.3          | 62.2           | 49.3           | 45.0            | 25.9              |
| right                        |               |            |            |              |               | 61.3           | 49.1           | 43.0            |                   |
| <i>S. etruscus</i>           |               |            |            |              |               |                |                |                 |                   |
| Min/Max/                     | 192/220.5/20  | 48.5/58.0/ | 42.0/51.0/ | 45.0/53.5/   | 18.0/24.5/    | 49.0/61.0/     | 43.0/50.0/     | 35.0/43.0/      |                   |
| Mean [29]                    | 1.5           | 53.5       | 45.8       | 48.8         | 20.7          | 56.5           | 46.2           | 40.5            |                   |
| Puebla de Valverde [21]      | 197           | 52.5       | 45.5       | 48.5         | 20.5          | 54.5           | 45.5           | 40.0            | 24.6              |
| Valdarno [35]                |               |            |            |              |               |                |                |                 |                   |
| Min/Max/                     | 189/200/195.  | 49.0/58.0/ | 39.0/45.0/ | 44.0/49.0/   | 17.0/20.0/    | 54.0/59.0/     |                | 39.0/42.0/      |                   |
| Mean                         | 7             | 52.7       | 42.8       | 46.8         | 19.0          | 56.3           |                | 40.3            |                   |
| Senèze [31]                  | 191.0         | 56.5       | 48.9       | 45.5         | 21.9          | 58.2           | 48.2           | 41.0            | 23.8              |
| <i>S. hundsheimensis</i>     |               |            |            |              |               |                |                |                 |                   |
| Min/Max/                     | 188.5/221/20  | 51.0/63.0/ | 42.0/51.5/ | 46.0/58.0/   | 18.5/24.0/    | 52.5/65.5/     | 43.0/54.5/     | 39.0/46.5/      |                   |
| Mean [29]                    | 4.7           | 55.1       | 46.9       | 51.1         | 21.3          | 59.3           | 48.2           | 43.3            |                   |
| Hundsheim [34]               | 215.0         | 62.0       | 52.0       | 52.5         | 24.0          | 50.5           |                | 51.0            | 24.4              |
| Vallonnet [31]               |               |            |            |              |               |                |                |                 |                   |
| Min/Max/                     | 199.7/203.1/2 | 46.6/54.4/ | 44.1/45.3/ | 47.3/47.8/   | 19.4/20.6/    | 58.0/58.2/     | 46.8/46.8/     | 41.8/45.2/      |                   |
| Mean                         | 01.4          | 51.6       | 44.5       | 47.6         | 20            | 58.1           | 46.6           | 43.5            |                   |
| Soleilhac [31]               | 198           | 53.4       | 48.2       | 45.6         | 19.9          | 54.6           | 45.5           | 42.5            | 23.0              |
|                              | 218           | 55.0       |            | 52.1         | 20.5          | 59.2           | 52.2           |                 | 23.8              |
| <i>S. Untermassfeld</i> [49] |               |            |            |              |               |                |                |                 |                   |
| Min/Max/                     | 200.5/221.6/2 | 54.7/66.3/ | 49.4/58.8/ | 45.1/53.6/   | 20.5/24.4/    | 52.0/64.6/     | 47.2/55.5/     | 42.5/49.2/      |                   |
| Mean                         | 10.4          | 59.3       | 53.2       | 50.3         | 22.9          | 58.1           | 51.8           | 46.4            |                   |
| Voigtstedt [45]              | 221.1         | 62.4       | 52.0       | 55.5         |               | 70.2           | 50.8           |                 | 25.1              |
| <i>S. hemitoechus</i>        |               |            |            |              |               |                |                |                 |                   |
| Min/Max/                     | 175/203/191.  | 53.5/65/59 | 42.5/57/50 | 42.5/57/52   | 19/26.5/21    | 52/66/59.4     | 48.5/56/51     | 43/50.5/45      |                   |
| Mean [29]                    | 8             | .2         | .3         | .2           | .5            |                | .9             | .4              |                   |
| Cova del Gegant [60]         | 185.5         | 54.5       | 46.5       | 47.5         | 18.5          | (50.5)         | 47.5           | 41.6            | 25.6              |
| Pinilla del Valle [3]        | 201.5         | 61.8       | 50.6       | 52.7         | 21.1          | 58.2           | 53.0           | 49.7            | 26.1              |
| Atapuerca [3]                | 188.3         |            | 43.8       | 46.7         | 21.4          | (53.2)         |                |                 | 24.8              |

**Table S18.** Dimensions of the Mc IV of *S. hundsheimensis* from Cova del Rinoceront compared with other remains of *Stephanorhinus*. Abbreviations: APD, anteroposterior diameter; Max, maximum; Min, minimum; Prox., proximal; TD, transversal diameter.

|                          | <b>Prox. TD</b>   | <b>Prox. APD</b>  |
|--------------------------|-------------------|-------------------|
| # 8096                   | 44.1              | 44.0              |
| <i>S. etruscus</i>       |                   |                   |
| Min/Max/Mean [29]        | 40.0/45.5/42.0    | 32.0/40.0/35.3    |
| Senèze [31]              | 39.2              | 37.5              |
| <i>S. hundsheimensis</i> |                   |                   |
| Min/Max/Mean [29]        | 38.0/48.0/44.7    | 32.0/48.0/39.0    |
| Hundsheim [34]           | 51.0              | 45.5              |
| Mosbach [23]             |                   |                   |
| Min/Max/Mean             | 42.8/44.0/43.3    | 38.5/44.0/41.6    |
| Untermassfeld [23]       |                   |                   |
| Min/Max/Mean             | 37.8/45.5/42.0    | 41.2/48.4/43.7    |
| Vallonnet [31]           | 39.5              | 37.5              |
|                          | 41.9              | 40.5              |
|                          | 41.8              | 44.3              |
| Isernia [46]             | 42.0              | 44.0              |
|                          | 45.5              | 44.5              |
|                          | 45.8              | 48.0              |
| Voigtstedt [49]          | 51.4              | 49.5              |
| Süssenborn [35]          | 43.7              | 46.0              |
| <i>S. hemitoechus</i>    |                   |                   |
| Min/Max/Mean [29]        | 40 / 52.5 / 46.18 | 33.5 / 42 / 39.71 |
| Caune de l'Arago [31]    | 45.44             | 37.60             |
| Lunel-Viel [79]          | 44.8              | 41.0              |
|                          | 42.7              | 43.2              |
| Valle Radice [11]        | 49.6              | 48.1              |
|                          | 47.4              | 44.8              |
| Cova del Gegant [60]     | 42.5              | 33.0              |

**Table S19.** Dimensions of the astragalus of *S. hundsheimensis* from Cova del Rinoceront compared with other remains of *Stephanorhinus*.

Abbreviations: APD, anteroposterior diameter; Art., articulation; Max, maximum; Min, minimum; TD, transversal diameter.

|                          | TD             | Height         | Medial APD     | TD Distal Art. | APD Distal Art. | TD trochlea    | TD Max. Distal |
|--------------------------|----------------|----------------|----------------|----------------|-----------------|----------------|----------------|
| # 8096                   | 84.8           | 75.4           | 64.5           | 64.5           | 34.1            | 57.0           | 70.8           |
| <i>S. etruscus</i>       |                |                |                |                |                 |                |                |
| Min/Max/Mean [29]        | 73.0/88/80.9   | 71.0/84.0/77.0 | 47.0/58.0/53.5 | 57.0/75.0/65.6 | 36.0/45.5/40.6  | 49.0/62.0/55.4 | 60.0/78.0/69.9 |
| Senèze [31]              | 85.2           | 77.1           | 57.1           | 64.1           | 43.2            | 55.9           | 64.1           |
|                          | 84.7           | 76.1           | 55.1           | 65.5           | 43.1            | 57.4           | 65.5           |
| <i>S. hundsheimensis</i> |                |                |                |                |                 |                |                |
| Min/Max/Mean [29]        | 76.0/107/86.0  | 67.0/89.0/79.9 | 46.0/68.0/55.7 | 59.5/85.0/71.6 | 35.0/52.0/41.2  | 52.0/71.0/60.4 | 61.0/83.0/73.7 |
| Hundsheim [34]           |                | 80.0           |                |                |                 |                |                |
| Vallonnet [31]           |                |                |                |                |                 |                |                |
| Min/Max/Mean             | 75.6/87.6/80.3 | 74.0/82.5/78.1 | 47.4/51.8/49.4 | 65.9/66.7/66.3 | 38.0            | 57.5/59.5/55.8 | 67.0/69.4/68.6 |
| Isernia [31]             |                |                |                |                |                 |                |                |
| Min/Max/Mean             | 86.1/98.2/93.5 | 77.0/80.9/78.3 | 54.3/55.8/55.1 | 73.5/79.2/75.5 | 40.8/45.8/43.3  | 54.0-51.3-52.7 | 73.3-70.3-68.8 |
| Cagnes sur Mer [31]      | 78.6           | 71.2           | 49.4           | 66.8           | 40.5            | 53.9           | 68.1           |
| Durfort [31]             | 87.5           | 78.8           | 55.1           | 69.9           | 41.7            | 57.5           | 73.5           |
| <i>S. hemitoechus</i>    |                |                |                |                |                 |                |                |
| Min/Max/Mean [29]        | 72.5/95/85.1   | 72/94/81.5     | 48/67/57.3     | 60.5/80/68.1   | 34/55/43.9      | 46/68/59.0     | 63.5/82/73.1   |
| Melpignano [10]          | 81.0           | 72.0           | 52.0           | 64.0           | 43.0            | 53.0           | 68.0           |
|                          | 80.0           | 71.0           | 46.0           | 55.0           | 36.0            | 50.0           | 60.0           |
| Atapuerca [3]            | 78.8           | 74.0           | 48.0           | 63.3           | 40.8            | 46.0           | 68.6           |
| Alfaguara [3]            | 70.0           | 66.0           | 44.7           | 55.6           | 36.5            | 50.0           | 58.3           |
|                          | 88.7           | 85.0           | 56.2           | 67.0           | 44.7            | 58.0           | 72.0           |
| Pinilla del Valle [3]    | 84.7           | 83.4           | 55.2           | 69.0           | 43.8            | 50.0           | 73.0           |
|                          | (85)           | 84.0           | 53.6           | 71.0           | 43.0            | 57.0           | 72.8           |

**Table S20.** Dimensions of the calcaneus of *S. hundsheimensis* from Cova del Rinoceront compared with other remains of *Stephanorhinus*.

Abbreviations: APD, anteroposterior diameter; Max, maximum; Min, minimum; Post., posterior; Sust., sustentaculum; TD, transversal diameter.

APD 'beak' taken at the level of the anterior border of the ectal facet [1,2].

|                          | Height             | APD Tuber       | TD tuber        | APD 'beak'      | TD Sust.        | Min. Post. TD     |
|--------------------------|--------------------|-----------------|-----------------|-----------------|-----------------|-------------------|
| # 8096                   | (109.6)            | 65.8            | 47.5            | (60.0)          | (78.7)          | 39.5              |
| <i>S. etruscus</i>       |                    |                 |                 |                 |                 |                   |
| Min/Max/Mean [29]        | 109/130/118.7      | 57.5/71.0/63.6  | 39.0/49.0/43.7  | 54.0/70.0/59.9  | 60.0/75.0/67.6  | 31.0/39.0/35.0    |
| Senèze [31]              | 121.4              | 62.7            | 44.4            | 56.0            | 72.8            | 37.7              |
|                          | 120.9              | 62.0            | 46.2            | 54.5            | 73.1            | 39.2              |
| <i>S. hundsheimensis</i> |                    |                 |                 |                 |                 |                   |
| Min/Max/Mean [29]        | 110/131/118.8      | 55.5/77.0/67.9  | 43.0/58.0/48.6  | 54 / 68 / 60.36 | 64 / 80 / 72.83 | 32.5 / 44 / 38.15 |
| Hundsheim [34]           | 132.4              | 82.0            | 45.0            |                 |                 |                   |
|                          | 114.2              | 72.0            |                 |                 |                 |                   |
| Soleilhac [31]           | 112.7              | 67.1            | 48.1            | 53.1            | 71.5            | 40.0              |
|                          | 132.0              | 68.6            | 56.5            | 63.0            | 85.5            | 47.7              |
| Isernia [31]             | 133.3              | 71.2            | 56.8            | 66.7            | 77.1            | 45.0              |
| <i>S. hemitoechus</i>    |                    |                 |                 |                 |                 |                   |
| Min/Max/Mean [29]        | 104 / 139 / 120.43 | 54 / 74 / 62.83 | 42 / 60 / 50.16 | 56 / 75 / 66.54 | 66 / 85 / 75.18 | 36 / 46.5 / 39.82 |
| Lunel-Viel               |                    |                 |                 |                 |                 |                   |
| Min/Max/Mean [31]        | 107.6/115.5/111.5  | 58.0/63.8/60.6  | 40.4/47.0/44.1  |                 | 75.2/83.6/79.4  | 35.0/41.3/37.6    |
|                          | 114.0              | 53.0            | 43.0            | 60.0            | 65.0            | 31.0              |
| Melpignano [10]          | 110.0              | 59.0            | 49.0            | 62.0            | 70.0            | 38.0              |
| Atapuerca [3]            | 114.0              | 56.0            | 39.3            | 58.6            | 62.4            | 31.5              |
| Alfaguara [3]            | 105.0              |                 | 40.3            |                 | 56.3            | 32.5              |
| Cueva del Congosto [3]   | 120.9              | (60.9)          | 50.0            | 68.0            | 79.0            | 36.5              |

**Table S21.** Dimensions of the cuboid of *S. hundsheimensis* from Cova del Rinoceront compared with other remains of *Stephanorhinus*. Abbreviations: APD, anteroposterior diameter; Art., articulation; Max, maximum; Min, minimum; TD, transversal diameter.

|                               | APD                  | TD                   | Height               | TD Prox. Art.        | APD Prox. Art.       | Anterior Height      |
|-------------------------------|----------------------|----------------------|----------------------|----------------------|----------------------|----------------------|
| # 8096                        | 55.0<br>54.2         | 44.9<br>43.5         | 52.1<br>(45.0)       | 40.1<br>(44.5)       | 36.2<br>39.1         | 35.6<br>36.9         |
| <i>S. etruscus</i>            |                      |                      |                      |                      |                      |                      |
| Min/Max/Mean [29]             | 53.0/67.0/58.5       | 36.0/48.0/41.3       | 50.0/62.0/55.6       | 34.5/43.0/40.1       | 34.0/47.0/39.8       | 36.0/42.5/39.8       |
| Valdarno [35]                 | 56.0/61.0/57.7       | 36.0/47.0/41.7       | 48.0/60.0/52.3       | 32.0/42.0/38.0       | 35.0/41.0/37.5       | 36.0/42.0/39.2       |
| Min/Max/Mean Pietrafitta [31] | 64.5                 | 43.9                 | 50.8                 | 44.2                 | 40.6                 | 39.6                 |
| <i>S. hundsheimensis</i>      |                      |                      |                      |                      |                      |                      |
| Min/Max/Mean [29]             | 55.5/70/63.2         | 37/44/40.9           | 51/70.5/57.4         | 38.5/43/41.5         | 36/48/42.4           | 36/43/40.6           |
| Hundsheim [34]                | 76.0<br>60.9         | 45.0<br>36.3         | 43.4<br>55.3         | 40.8                 | 41.5                 | 40.0                 |
| Soleilhac [31]                | 59.2<br>57.4<br>67.6 | 36.8<br>41.3<br>43.0 | 53.0<br>52.4<br>62.0 | 38.5<br>37.1<br>41.7 | 42.9<br>43.5<br>47.6 | 39.8<br>37.0<br>41.5 |
| Isernia [31]                  | 65.2<br>65.5         | 44.5<br>41.9         | 64.2<br>62.6         | 40.7<br>43.1         | 45.0<br>45.3         | 41.8<br>42.4         |
| Untermassfeld [49]            |                      |                      |                      |                      |                      |                      |
| Min/Max/Mean                  | 60.4/73.1/67.0       | 44.4/56.3/48.5       | 54.3/64.9/58.8       | 44.7/52.2/47.7       | 40.5/52.5/45.7       |                      |
| Voigtstedt [45]               | 71.2                 | 62.0                 | 65.5                 | 51.1                 | 54.5                 |                      |
| <i>S. hemitoechus</i>         |                      |                      |                      |                      |                      |                      |
| Min/Max/Mean [29]             | 55/71/61.2           | 38/53/44.4           | 54/67/62.6           | 38/46/42.7           | 33/42/36.9           | 39/44.5/41.8         |
| Caune de l'Arago [31]         | 64.6                 | 38.1                 | 55.8                 | 40.7                 | 41.0                 | 42.2                 |
| Orgnac 3 [31]                 | 55.4<br>57.7         | 38.2<br>37.7         | 56.4                 | 33.6                 | 37.5<br>37.5         | 41.5<br>40.7         |
| Pinilla del Valle [3]         | 58.5<br>58.0         | 40.5<br>44.2         | 51.0<br>51.0         | 37.8<br>39.5         | 41.6<br>44.3         | 39.0<br>36.8         |
| Alfaguara [3]                 | 50                   | 35                   | 52                   | 35                   | 32.5                 | 34.8                 |

**Table S22.** Dimensions of the navicular of *S. hundsheimensis* from Cova del Rinoceront compared with other remains of *Stephanorhinus*. Abbreviations: APD, anteroposterior diameter; Max, maximum; Min, minimum; TD, transversal diameter.

|                          | APD            | TD             | Height         |
|--------------------------|----------------|----------------|----------------|
| # 8096                   | 57.7<br>58.0   | 43.9<br>44.4   | 29.4<br>29.8   |
| <i>S. etruscus</i>       |                |                |                |
| Min/Max/Mean [29]        | 52.0/61.0/55.4 | 37.0/49.0/43.7 | 24.5/33.0/29.9 |
| Senèze [31]              | 56.1<br>55.8   | 42.3<br>42.3   | 30.1<br>29.5   |
| <i>S. hundsheimensis</i> |                |                |                |
| Min/Max/Mean [29]        | 53.0/63.0/58.0 | 37.0/55.0/46.2 | 24.5/34.0/29.6 |
|                          | 55.0           | 40.8           | 29.0           |
| Soleilhac [31]           | 56.4<br>54.9   | 38.0<br>40.0   | 25.8<br>28.4   |
|                          | 54.0           | 45.5           | 28.4           |
| Pietrafita [31]          | 62.0           | 44.0           | 27.0           |
| Hundsheim [34]           | 63.6           | 48.7           | 33.0           |
| Voigtstedt [45]          | 63.2<br>64.2   | 49.2<br>52.0   | 32.7<br>33.4   |
| <i>S. hemitoechus</i>    |                |                |                |
| Min/Max/Mean [29]        | 58.0/67.0/62.4 | 42.0/56.0/48.9 | 26.5/36.5/31.6 |
| Caune de l'Arago [31]    |                |                |                |
| Min/Max/Mean             | 61.2/61.8/61.5 | 41.7/46.3/43.6 | 28.3/31.1/29.7 |
| Mars [31]                | 61.3           | 47.4           | 27.4           |

**Table S23.** Dimensions of the ectocuneiform of *S. hundsheimensis* from Cova del Rinoceront compared with other remains of *Stephanorhinus*. Abbreviations: APD, anteroposterior diameter; Max, maximum; Min, minimum; TD, transversal diameter.

|                          | APD            | TD             | Height         |
|--------------------------|----------------|----------------|----------------|
| # 8096 right             | 45.7           | 42.5           | 28.5           |
| left                     | 47.4           | 42.4           | 28.0           |
| <i>S. etruscus</i>       |                |                |                |
| Min/Max/Mean [29]        | 37.0/50.5/44.6 | 36.0/46.0/41.0 | 22.5/31.0/26.2 |
| Upper Valdarno [31]      |                |                |                |
| Min/Max/Mean             | 42.0/47.0/45.0 | 36.0/42.0/39.8 | 23.0/27.0/24.7 |
|                          | 44.7           | 43.7           | 25.3           |
| Senèze [31]              | 44.4           | 42.8           | 25.6           |
| <i>S. hundsheimensis</i> |                |                |                |
| Min/Max/Mean [29]        | 42.5/51/46.9   | 41/47/43.7     | 22.5/30/26.1   |
|                          | 47.3           | 41.2           | 21.8           |
| Soleilhac [31]           | 53.0           | 47.1           | 27.2           |
| Isernia [31]             | 48.7           | 44.6           | 25.2           |
|                          | 44.7           | 37.2           | 23.9           |
| Pietrafita [31]          | 43.2           | 38.2           | 25.0           |
| Hundsheim [34]           | 49.8           | 47.0           | 32.3           |
|                          | 47.4           | 45.8           | 29.9           |
|                          | 49.8           | 49.5           | 27.2           |
| Untermassfeld [49]       | 51.8           | 49.2           | 26.7           |
|                          | 48.7           | 46.0           | 26.4           |
|                          | 46.2           | 44.5           | 26.0           |
| <i>S. hemitoechus</i>    |                |                |                |
| Min/Max/Mean [29]        | 42.5/51.5/47.6 | 41.5/48.0/45.4 | 22.5/30.5/26.3 |
| Caune del' Arago [31]    | 39.6/46.9/42.9 | 40.1/43.5/41.6 | 19.7/25.4/23.1 |
| Mars [31]                | 50.2           | 47.8           | 26.5           |

**Table S24.** Dimensions of the mesocuneiform of *S. hundsheimensis* from Cova del Rinoceront compared with other remains of *Stephanorhinus*. Abbreviations: APD, anteroposterior diameter; Max, maximum; Min, minimum; TD, transversal diameter.

|                          | <b>APD</b>     | <b>TD</b>      | <b>Height</b>  |
|--------------------------|----------------|----------------|----------------|
| # 8096                   | (32.0)         | 20.2           | 16.8           |
| <i>S. etruscus</i>       |                |                |                |
| Min/Max/Mean [29]        | 27/33/29.8     | 16/21/19.1     | 14.5/25/18.9   |
|                          | 32.0           | 20.6           | 18.0           |
| Senèze [31]              | 33.8           | 20.4           | 18.2           |
| <i>S. hundsheimensis</i> |                |                |                |
| Min/Max/Mean [29]        | 27/36.5/32.94  | 18/22/20.13    | 14/19/17.25    |
| Hundsheim [34]           | 32.0           | 17.5           | 17.2           |
|                          | 33.4           | 20.7           | 18.5           |
|                          | 35.9           | 20.9           | 17.0           |
| Untermassfeld [49]       | 36.5           | 22.0           | 18.4           |
|                          | 36.6           | 21.2           | 16.2           |
| <i>S. hemitoechus</i>    |                |                |                |
| Min/Max/Mean [29]        | 27.0/33.0/30.3 | 19.0/25.0/22.0 | 14.5/18.0/16.5 |
| Caune de l'Arago [31]    |                |                |                |
| Min/Max/Mean             | 28.2/36.7/31.5 | 18.9/24.1/21.1 | 12.8/18.6/15.4 |
| Orgnac [31]              | 31.0           | 19.1           | 14.5           |



**Table S25.** Dimensions of the entocuneiform of *S. hundsheimensis* from Cova del Rinoceront compared with other remains of *Stephanorhinus*. Abbreviations: APD, anteroposterior diameter; Max, maximum; Min, minimum; TD, transversal diameter.

|                          | <b>Length</b>  | <b>TD</b>      | <b>APD</b>     |
|--------------------------|----------------|----------------|----------------|
| # 8096                   | 65.2           | 28.1           | 18.9           |
| <i>S. etruscus</i>       |                |                |                |
| Min/Max/Mean [29]        | 53.0/73.0/64.2 | 28.0/36.0/31.7 | 16.0/22.0/19.1 |
| Senèze [31]              | 65.2           | 30.9           | 15.9           |
|                          | 66.7           | 32.3           | 19.6           |
| Upper Valdarno [31]      | 46.0           | 29.0           | 19.0           |
|                          | 44.0           | 30.0           | 20.0           |
| <i>S. hundsheimensis</i> |                |                |                |
| Min/Max/Mean [29]        | 57.0/68.5/62.9 | 26.0/33.5/30.4 | 16.0/23.5/21.0 |
| Soleilhac [31]           | 57.2           | 25.4           | 14.8           |
|                          | 56.3           | 24.4           | 14.6           |
| Pietrafita [31]          | 60.5           | 29.0           | 20.0           |
| Hundsheim [34]           | 72.6           | 39.0           | 22.0           |
|                          | 74.2           | 21.7           | 21.0           |
| Untermassfeld [49]       | 71.7           | 26.5           | 25.5           |
|                          | 69.1           | 29.2           | 18.6           |
| <i>S. hemitoechus</i>    |                |                |                |
| Min/Max/Mean [29]        | 61.0/72.0/68.0 | 32.5/38.0/35.3 | 21.0           |
| Caune de l'Arago [31]    | 68.2           | 24.5           | 19.4           |

**Table S26.** Dimensions of the Mt II of *S. hundsheimensis* from Cova del Rinoceront compared with other remains of *Stephanorhinus*.

Abbreviations: APD, anteroposterior diameter; Art., articulation; diaph., diaphysis; L, length; Max, maximum; Min, minimum; Prox, proximal; TD, transversal diameter.

|                          | Length     | Prox. TD    | Prox. APD   | TD<br>Diaphysis | APD<br>Diaphysis | TD<br>Max. Distal | TD<br>Distal Art. | APD<br>Distal Art. | 100 ×<br>TDdiaph/<br>L |
|--------------------------|------------|-------------|-------------|-----------------|------------------|-------------------|-------------------|--------------------|------------------------|
| # 8096 right             | 151.7      | 27.9        | 41.1        | 23.7            | 27.2             | 33.5              | 35.0              | 32.3               | 15.6                   |
| # 8096 left              | 153.2      | 28.2        | 40.1        | 24.1            | 26.5             | 36.5              | 32.9              | 31.9               | 15.7                   |
| # 8661                   |            |             | (44.4)      | 20.0            | 30.0             |                   |                   |                    |                        |
| <i>S. etruscus</i>       |            |             |             |                 |                  |                   |                   |                    |                        |
| Min/Max/Mean             | 145/162/15 | 21.0/31.0/2 | 32.5/42.0/3 | 22.5/29.0/2     | 21.0/27.5/2      | 34.0/41.0/3       | 32.0/39.0/3       | 31.0/35.0/32.      |                        |
| [29]                     | 5.4        | 7.1         | 7.9         | 5.9             | 4.4              | 7.1               | 5.2               | 9                  |                        |
| Senèze [31]              | 157.0      | 26.1        | 41.3        | 26.7            | 25.4             | 34.0              | 30.7              | 35.7               | 17.0                   |
|                          | 157.0      | 25.8        | 41.4        | 26.0            | 25.4             | 35.6              | 29.3              | 35.4               | 16.5                   |
| Upper Valdarno           |            |             |             |                 |                  |                   |                   |                    |                        |
| [31]                     | 149/179/15 | 25.0/42.0/3 | 32.0/39.0/3 | 20.0/30.0/2     | 21.0/29.0/2      | 34.0/44.0/3       |                   | 34.0/44.0/36.      |                        |
| Min/Max/Mean             | 7.4        | 1.5         | 5.2         | 5.6             | 3.5              | 7.5               |                   | 3                  |                        |
| <i>S. hundsheimensis</i> |            |             |             |                 |                  |                   |                   |                    |                        |
| Min/Max/Mean             | 151/171/16 | 26.0/32.0/2 | 38.0/46.0/4 | 23/32           |                  | 33.5/41.5/3       | 35.5/41.5/3       | 28.5/35/31.2       |                        |
| [29]                     | 0.2        | 8.3         | 1.5         | 5/27.2          | 20/28/23.8       | 7.2               | 7.7               |                    |                        |
| Vallonnet [31]           | 153.1      | 29.8        | 37.3        | 23.4            | 20.8             |                   |                   |                    | 15.3                   |
|                          | 153.2      | 34.0        | 36.3        | 29.1            | 19.7             |                   |                   |                    | 18.9                   |
| Isernia [31]             | 158.7      | 39.8        | 43.8        | 34.8            | 23.8             | 42.6              | 35.5              | 40.8               | 21.9                   |
| Pietrafitta [31]         | 150.5      | 28.0        | 36.5        | 25.5            | 24.0             | 36.8              | 34.2              | 37.2               | 16.9                   |
| Voigtstedt [45]          | 173.2      | 33.6        | 44.2        | 22.6            |                  | 37.0              | 33.6              |                    | 13.0                   |
|                          | 173.5      | 33.5        | 44.0        | 23.2            |                  | 37.5              | 33.5              |                    | 13.3                   |
| Hundsheim [34]           | 170.0      | 37.0        | 45.5        | 30.0            | 26.0             | 39.0              | 35.0              | 45.0               | 17.6                   |
| Untermassfeld [49]       | 161.0      |             | 45.8        | 26.9            | 23.5             | 38.4              | 34.7              | 41.5               | 16.7                   |
|                          | 171.4      | 33.0        | 45.5        | 27.4            | 25.1             | 36.0              | 32.4              | 39.0               | 16.0                   |
|                          | 167.2      | 34.5        | 46.0        | 26.7            | 26.1             | 36.1              | 35.0              | 41.3               | 16.0                   |
|                          | 172.5      | 33.2        | 40.5        |                 |                  | 34.3              | 32.0              | 34.0               |                        |
| <i>S. hemitoechus</i>    |            |             |             |                 |                  |                   |                   |                    |                        |
| Min/Max/Mean             | 137/158/14 | 28/34.5/31. | 38.5/45/42. | 25.5/33/29.     |                  | 33/41/37.0        | 34/40.5/37.       | 29.5/39/34.3       |                        |
| [29]                     | 8.8        | 0           | 0           | 6               | 22/29/24.5       |                   | 6                 |                    |                        |
| Neumark Nord [12]        | 153.2      | 33.3        | 46.6        |                 |                  | 39.8              |                   | 41.3               |                        |
|                          | 163.6      | 34.8        | 48.0        |                 |                  | 40.0              |                   | 40.9               |                        |
| Lunel Viel [14]          | 144.5      | 38.2        |             | 26.4            |                  | 34.2              |                   |                    | 18.3                   |
|                          | (144)      | 41.2        | 35.1        | 27.0            |                  | 31.3              |                   |                    |                        |
| Alfaguara [3]            | 136.2      | 21.3        | 31.0        | 19.7            | 22.0             | 29.0              |                   |                    | 14.5                   |

**Table S27.** Dimensions of the Mt III of *S. hundsheimensis* from Cova del Rinoceront compared with other remains of *Stephanorhinus*.

Abbreviations: APD, anteroposterior diameter; Art., articulation; diaph., diaphysis; L, length; Max, maximum; Min, minimum; Prox, proximal; TD, transversal diameter.

|                          | Length            | Prox. TD       | Prox. APD      | Diaphysis TD   | Diaphysis APD  | Max. TD        | Distal TD      | Distal Art. APD | 100 × TDdiaph/L |
|--------------------------|-------------------|----------------|----------------|----------------|----------------|----------------|----------------|-----------------|-----------------|
| # 8096 right             | 167.1             | 47.5           | 39.9           | 41.0           | 20.1           | 49.5           | 46.6           | 40.0            | 24.5            |
| left                     | 165.1             | 46.4           | 42.4           | 39.4           | 20.2           | 50.6           | 45.4           | 39.6            | 23.9            |
| # 8661 right             |                   | 50.1           |                | 45.5           | 20.1           |                |                |                 |                 |
| left                     |                   | 47.5           | 41.0           |                |                |                |                |                 |                 |
| <i>S. etruscus</i>       |                   |                |                |                |                |                |                |                 |                 |
| Min/Max/Mean [29]        | 165/187/175.9     | 43.0/56.0/48.5 | 38.0/47.0/41.9 | 33.5/45.0/40.2 | 21.5/25.0/22.9 | 48.0/59.0/53.5 | 39.0/46.0/42.5 | 32.0/40.0/36.7  |                 |
| Senèze [31]              | 174.0             | 51.8           | 47.5           | 41.4           | 23.2           | 54.4           | 44.7           | 37.0            | 23.8            |
|                          | 176.0             | 51.1           | 48.8           | 41.1           | 23.3           | 54.0           | 44.9           | 37.3            | 23.4            |
| <i>S. hundsheimensis</i> |                   |                |                |                |                |                |                |                 |                 |
| Min/Max/Mean [29]        | 167/197/186.6     | 37.0/54.5/50.8 | 39.5/47.5/43.5 | 33.0/46.0/40.0 | 20.0/29.0/24.5 | 46.0/59.5/52.8 | 39.0/48.0/43.5 | 33.5/43.0/38.5  |                 |
| Soleilhac [31]           |                   | 48.4           | 40.9           | 37.5           | 22.7           |                |                |                 |                 |
| Isernia [31]             | 209.1             | 61.5           | 48.7           | 53.8           | 21.3           | 46.4           | 50.4           |                 | 25.7            |
| Hundsheim [34]           | 197.0             | 58.0           | 36.0           | 45.7           | 25.6           | 61.0           | 49.0           | 46.4            | 23.2            |
| Untermassfeld [49]       | 178.8/203.6/192.1 | 51.2/57.2/54.2 | 43.9/53.4/48.6 | 40.2/43.9/41.8 | 23.0/28.4/25.1 | 53.6/60.8/56.8 | 45.0/49.7/47.4 | 38.9/43.0/40.4  |                 |
| Min/Max/Mean [45]        | 92.9              | 3              | 0.5            | 8              | 5.1            | 5.9            | 7.4            | 1.2             |                 |
| Voigtstedt [45]          | 199.5             | 56.6           | 49.8           | 42.6           |                | 60.3           | 44.7           |                 | 21.4            |
| <i>S. hemitoechus</i>    |                   |                |                |                |                |                |                |                 |                 |
| Min/Max/Mean [29]        | 152/178/167.6     | 42/54.5/49.0   | 37/47/41.8     | 38/48/43.8     | 17.5/24/21.1   | 46/57.5/52.2   | 38.5/51/46.1   | 32.5/45/39.3    |                 |
| Orgnac 3 [31]            | 152.9             | 42.1           | 38.6           | 40.1           | 17.9           |                | 38.6           | 33.8            | 26.2            |
| Mars [31]                | 167.0             | 52.3           | 47.0           | 43.2           | 20.6           | 52.4           | 47.7           | 41.0            | 25.9            |
| Alfaguara [3]            | 150.3             | 39.2           | 35.0           | 35.6           | 20.0           | 44.4           | 36.8           | 32.5            | 23.7            |
| Atapuerca [3]            | 171.2             | 48.0           | 42.7           | 37.5           | 23.2           | 50.8           | 40.6           | 37.0            | 21.9            |
| Lezetxiki [3]            | 178.0             | 51.3           | 42.5           | 44.3           | 22.0           | 55.2           | 47.7           | 39.3            | 24.9            |

**Table S28.** Dimensions of the Mt IV of *S. hundsheimensis* from Cova del Rinoceront compared with other remains of *Stephanorhinus*.

Abbreviations: APD, anteroposterior diameter; diaph., diaphysis; L, length; Max, maximum; Min, minimum; Prox, proximal; TD, transversal diameter.

|                          | Length        | Prox. TD      | Prox. APD   | Diaphysis TD | Diaphysis APD | Max. Distal TD | Distal Art. TD | Distal Art. APD | 100 × TDdiaph/L |
|--------------------------|---------------|---------------|-------------|--------------|---------------|----------------|----------------|-----------------|-----------------|
| # 8096 right             | 145.1         |               | 32.9        | 28.0         | 22.3          | 33.0           | 28.2           | 36.6            | 15.7            |
| left                     | 146.6         | 46.0          | 42.6        | 23.7         | 26.8          | 30.9           | 28.9           | 36.0            | 19.3            |
| <i>S. etruscus</i>       |               |               |             |              |               |                |                |                 |                 |
| Min/Max/Mean             | 145/162/155.4 | 21.0/31.0/27. | 32.5/42.0/3 | 22.5/29.0/2  | 21.0/27.5/24. | 34.0/41.0/3    | 31.0/35.0/     | 32.0/39.0/3     |                 |
| [29]                     |               | 1             | 7.9         | 5.9          | 4             | 7.1            | 32.9           | 5.2             |                 |
| Senèze [31]              | 151.0         | 40.9          | 35.4        | 28.3         | 23.3          | 32.3           | 30.2           | 35.4            | 18.7            |
| <i>S. hundsheimensis</i> |               |               |             |              |               |                |                |                 |                 |
| Min/Max/Mean             | 152.5/166.5/1 | 36.5/46.0/40. | 33.5/43.5/3 | 22.0/35.5/2  | 19.0/30.0/25. | 29.0/35.0/3    | 28.5/38.0/     | 35.0/40.0/3     |                 |
| [29]                     | 61.3          | 2             | 8.3         | 7.3          | 2             | 2.0            | 31.6           | 7.9             |                 |
| Hundsheim [34]           | 169.4         | 45.5          | 45.0        | 31.0         | 24.0          | 38.7           | 36.5           | 41.2            | 18.8            |
| Solheilac [31]           | 165.0         | 38.1          | 37.3        | 30.3         | 20.3          | 31.1           | 30.0           | 38.3            | 18.4            |
| Vallonet [31]            |               | 39.4          | 35.0        | 26.4         | 21.3          |                |                |                 |                 |
| Pietrafitta [31]         | 153.0         | 43.3          | 35.8        | 28.0         | 22.4          | 35.5           |                | 40.0            | 18.3            |
| Untermassfeld [49]       | 170.8         | 44.4          | 39.7        | 30.0         | 27.8          | 39.5           | 36.8           | 42.7            | 17.6            |
|                          | 175.3         | 47.2          | 40.2        | 30.9         | 22.6          | 37.7           | 38.0           | 42.1            | 17.6            |
|                          | 165.2         | 43.3          | 42.7        | 31.5         | 35.5          | 38.1           | 38.7           | 40.7            | 19.1            |
|                          | 160.3         | 41.0          | 36.9        | 31.5         | 20.0          | 37.7           | 34.6           | 40.0            | 19.7            |
| Voigtstedt [45]          | 173.3         | 41.7          | 38.2        | 22.8         |               | 36.4           | 34.5           |                 | 13.2            |
|                          | 173.5         | 41.5          |             | 22.5         |               | 36.5           | 34.6           |                 | 13.0            |
| <i>S. hemitoechus</i>    |               |               |             |              |               |                |                |                 |                 |
| Min/Max/Mean             | 136/169.5/150 | 33.5/48/41.4  | 33.5/46.5/4 | 20/34.5/27.  | 22/31/26.9    | 27/39/32.7     | 27/37.5/33     | 32.5/43/37.     |                 |
| [29]                     | .4            |               | 0.4         | 3            |               |                | .2             | 1               |                 |
| Melpignano [10]          | 136           | (36)          | (37)        | 24.0         | 25.0          | 28.0           | 26.0           | 35.0            | 17.6            |
| Neumark Nord [12]        | 163.8         | 51.6          | 52.1        |              |               | 39.4           |                | 43.0            |                 |
|                          | 162.9         | 51.2          | 51.8        |              |               | 39.1           |                | 43.6            |                 |
| Atapuerca [45]           | 150.6         | 33.0          | 37.0        | 28.3         | 19.0          | 27.0           | 26.0           | 34.2            | 18.8            |
|                          | 143.3         | 40.3          | 34.0        | 28.0         | 18.6          | 29.2           | 28.2           | 36.2            | 19.5            |

**Table S29.** Dimensions of the central and lateral phalanges of *S. hundsheimensis* from Cova del Rinoceront.

Abbreviations: APD, anteroposterior diameter; Art., articulation; Prox, proximal; TD, transversal diameter.

| <b>1st central phalanx</b> | <b>Length</b> | <b>TD Prox. Art.</b> | <b>APD Prox. Art.</b> | <b>TD Distal Art.</b> | <b>APD Distal Art.</b> |
|----------------------------|---------------|----------------------|-----------------------|-----------------------|------------------------|
| # 8096                     | 43.5          | 41.5                 | 24.6                  | 40.0                  | 21.4                   |
|                            | 45.4          | 42.5                 | 25.1                  | 40.2                  | 22.4                   |
| <b>2nd central phalanx</b> |               |                      |                       |                       |                        |
| # 8661                     | 37.0          | 39.3                 | 24.0                  | 45                    | 20                     |
| # 8096                     | 36.2          | 40.6                 | 21.8                  | 44.9                  | 19.9                   |
|                            | 33.2          | 40.7                 | 20.7                  | 43.3                  | 20.0                   |
|                            | 32.8          |                      | 24.5                  | 44.9                  | 19.2                   |
| <b>3rd central phalanx</b> |               |                      |                       |                       |                        |
| # 8096                     | 65.9          | 46.6                 | 17.3                  |                       |                        |
| <b>1st lateral phalanx</b> |               |                      |                       |                       |                        |
| # 8661                     | 38.9          | 24.8                 | 25.7                  | 28.9                  | 24.5                   |
|                            | 36.9          | 23.6                 | 24.9                  | 30.0                  | 25.5                   |
|                            | 39.6          | 30.9                 | 28.4                  | 30.0                  | 25.5                   |
|                            | 36.0          | 30.1                 | 25.5                  | 36.2                  | 30.0                   |
|                            | 37.5          | 26.7                 | 26.0                  | 33.2                  | 25.7                   |
|                            | 40.2          | 27.4                 | 26.8                  | 32.6                  | 24.3                   |
| <b>2nd lateral phalanx</b> |               |                      |                       |                       |                        |
| # 8661                     | 32.0          | 37.0                 | 22.7                  | 28.5                  | 23.1                   |
|                            | 27.0          | 33.0                 |                       | 27.5                  | 22.0                   |
|                            | 26.0          | 29.8                 | 22.9                  | 27.4                  | 21.9                   |
|                            | 25.8          | 28.6                 | 21.6                  | 25.9                  | 20.0                   |
|                            | 28.1          | 32.0                 | 22.6                  | 23.5                  | 21.1                   |
| <b>3rd lateral phalanx</b> |               |                      |                       |                       |                        |
| # 8096                     | 51.4          | 33.5                 | 21.1                  |                       |                        |
|                            | 60.2          | 40.5                 | 22.8                  |                       |                        |
|                            | (50)          | 38.1                 | 18.1                  |                       |                        |

## References

29. Guérin, C. Les Rhinocerotidae (Mammalia-Perissodactyla) du Miocene Terminal au Pléistocène supérieur d'Europe Occidentale comparación avec les especes actuelles. *Doc. Lab. Géol. Lyon* **1980**, 79, 1–1185.
31. Lacombat, F. Les rhinocéros fossiles des sites préhistoriques de l'Europe méditerranéenne et du Massif Central, Paléontologie et implications bichronologiques. *British Archaeol. Reports, Intern. Series* **2005**, 1419, 1–175.
5. Pandolfi, L.; Marra, F. Rhinocerotidae (Mammalia, Perissodactyla) from the chrono-stratigraphically constrained Pleistocene deposits of the urban area of Rome (Central Italy). *Geobios* **2015**, 699: 1–64.
34. Toulà, F. Das Nashorn von Hundsheim Rhinoceros (*Ceratorhinus* Osborn) *Hundsheimensis* nov. form. Mit Ausführung über die Verhältnisse von elf Schädeln von *Rhinoceros* (*Ceratorhinus*) *sumatrensis*. *Abh. KK Geol. Reich.* **1902**, 19(1): 1–92.
38. Kotowski, A.; Stefaniak, K.; Kahlke, R.-D. A rhinocerotid skull from the Early Pleistocene site of Untermassfeld. In *The Pleistocene of Untermassfeld near Meiningen (Thüringen, Germany)*, Part 4; Kahlke, R.-D., Ed.; Römisch-Germanisches Zentralmuseum, Mainz, Germany, 2020; Part 4, pp. 273–1294.
43. Pandolfi, L.; Gaeta, M.; Petronio, C. The skull of *Stephanorhinus hemitoechus* (Mammalia, Rhinocerotidae) from the Middle Pleistocene of Campagna Romana (Rome, central Italy): biochronological and paleobiogeographic implications. *Bull. Geosciences* **2013**, 88(1), 51–62.
12. Van der Made, J. The rhinos from the Middle Pleistocene of Neumark-Nord (Saxony-Anhalt). *Veröffentlich. Land. Denkm. Archäol.* **2010**, 62, 433–527.
78. Petronio, C. Una mandibola di rinoceronte di Ponte Galeria. *Atti Soc. Sci. Nat.* **1988**, 129(2–3): 173–178.
11. Pandolfi, L.; Tagliacozzo, A. *Stephanorhinus hemitoechus* (Mammalia, Rhinocerotidae) from the Late Pleistocene of Valle Radice (Sora, Central Italy) and re-evaluation of the morphometric variability of the species in Europe. *Geobios* **2015**, 48, 169–191.
64. Petronio, C.; Pandolfi, L. *Stephanorhinus hemitoechus* (Falconer, 1868) del Pleistocene superiore dell'area di Melpignano-Cursi e S. Sidero (Lecce, Italia). *Geol. Romana* **2008**, 41, 1–12.
49. Kahlke, H.D. Die Rhinocerotiden-Reste aus dem unterpleistozän von Untermassfeld. In Kahlke R.-D. (Ed.), *Das Pleistozän von Untermassfeld bei Meiningen, Thüringen. Monogr. Römisch-German. Zentralmus. Mainz* **2001**, 40(2), 501–556.
45. Kahlke, H.D. Die Rhinocerotiden-Reste aus den Tonen von Voigtstedt in Thüringen. *Palaeontol. Abh. A* **1965**, 2(2–3), 451–520.
3. Cerdeño, E. *Stephanorhinus hemitoechus* (Falc.) (Rhinocerotidae, Mammalia) del Pleistoceno medio y superior de España. *Est. Geol.* **1990**, 46, 465–479.
79. Bonifay M.F. *Dicerorhinus etruscus* Falc. du Pléistocène moyen des grottes de Lunel-Viel (Hérault). *Ann. Paléont.* **1973**, 59(1), 79–111.
60. Santafé, J.V.; Casanovas, M.L. *Dicerorhinus hemitoechus* (Falconer, 1868) (Mammalia, Perissodactyla) del yacimiento Pleistocénico de la Cova del Gegant (Garraf, Barcelona). *Empúries* **1986**, 48–50, 310–322.
30. Fortelius, M.; Mazza, P.; Sala, B. *Stephanorhinus* (Mammalia-Rhinocerotidae) of the Western European Pleistocene, with a revision of *S. etruscus* (Falconer, 1868). *Palaeontogr. Ital.* **1993**, 80, 63–155.
46. Sala, B.; Fortelius, M. The Rhinoceros of Isernia La Pineta (early Middle Pleistocene, Southern Italy). *Palaeontogr. Ital.* **1993**, 80, 157–174.
48. Kahlke, H.D. Die Rhinocerotiden-Reste aus den Kiesen von Süssenborn bei Weimar. *Palaeontol. Abh. A* **1969**, 3(3–4), 667–709.
61. Mazza, P.; Sala, B.; Fortelius, M. A small latest Villafranchian (late Early Pleistocene) rhinoceros from Pietrafitta (Perugia, Umbria, Central Italy) with notes on the Pirro and Westerhoven rhinoceroses. *Palaeontogr. Ital.* **1993**, 8, 25–50.
35. Mazza, P. The Tuscan Early Pleistocene *Dicerorhinus etruscus*. *Palaeontogr. Ital.* **1988**, 75, 1–87.
75. Pandolfi, L.; Petronio, C. *Stephanorhinus etruscus* (Falconer, 1868) from Pirro Nord (Apricena, Foggia, Southern Italy) with notes on the older late Early Pleistocene rhinoceros remains of Italy. *Riv. Ital. Paleontol. Stratigr.* **2011**, 117(1), 173–187.
